# Supplementary material for: Combatting type 2 diabetes by turning up the heat
Source: Springer Nature journal article supplement (doi:10.1007/s00125-016-4068-3), 2016-09-03

# Interventions targeting energy turnover can affect metabolic health

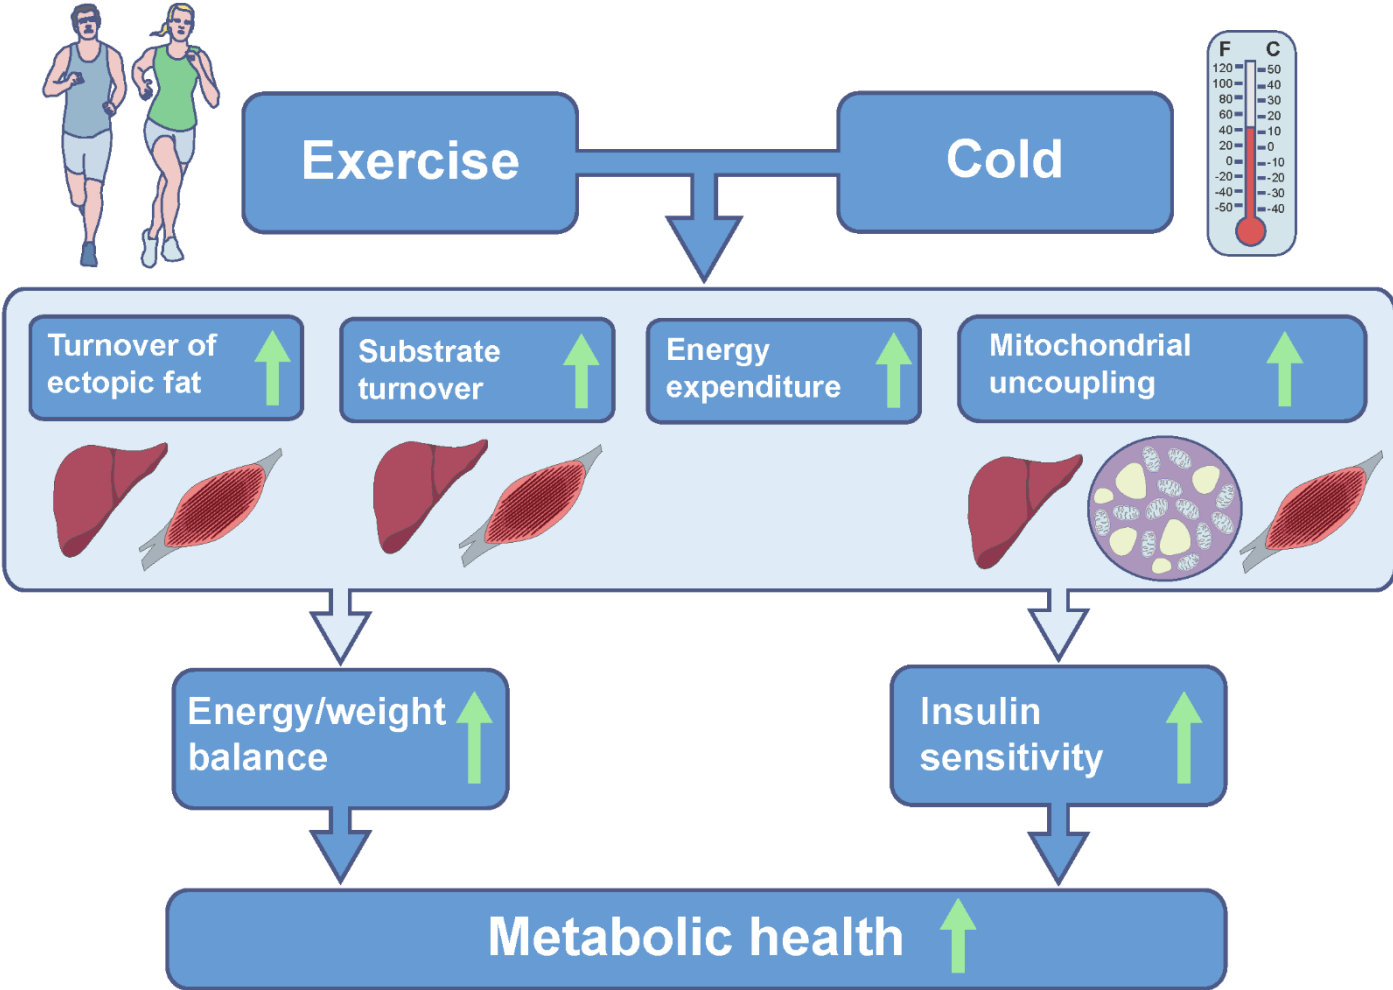

# Cellular mechanisms linking energy-boosting interventions to metabolic health effects

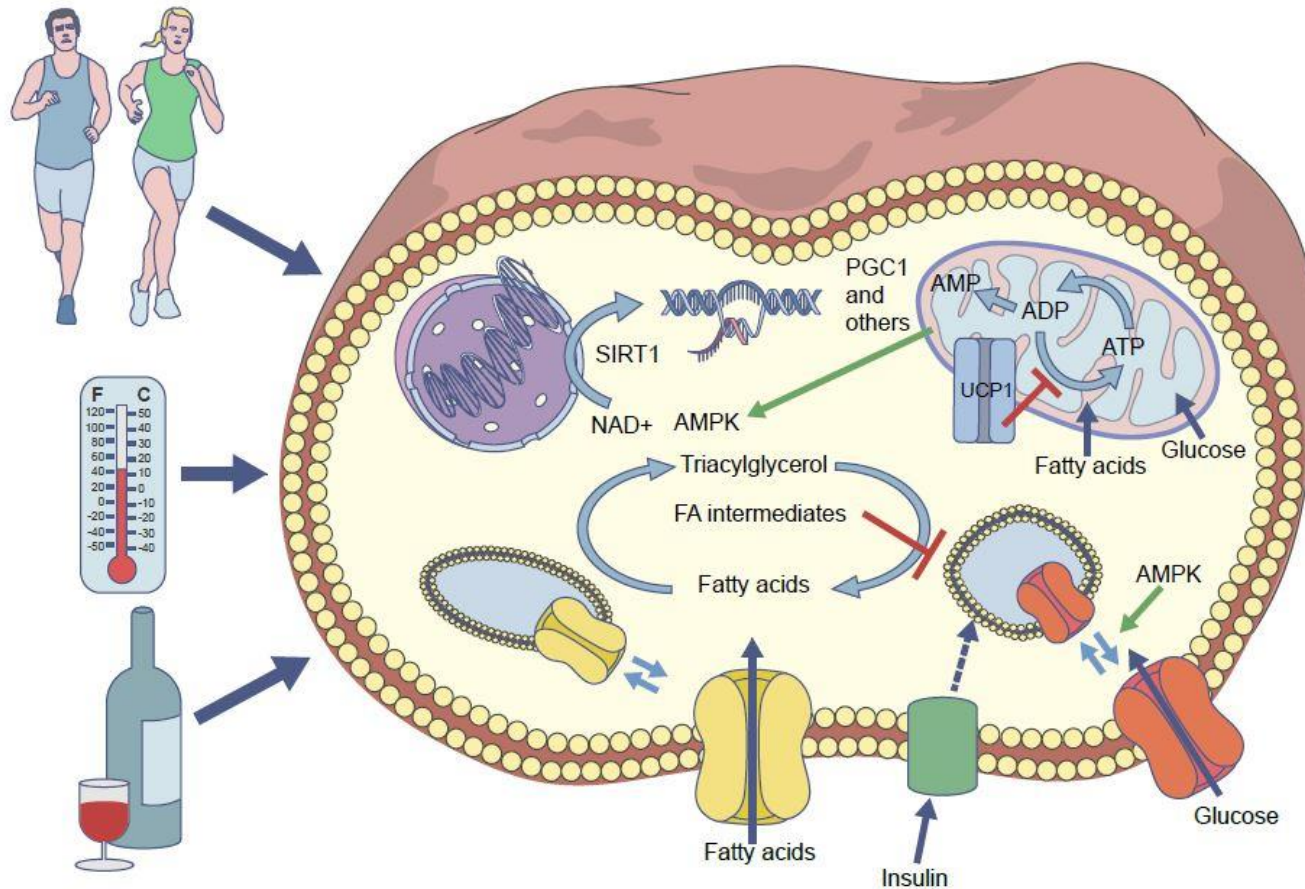

Supplement: MOESM1 [file 10645820]
